# Supplementary material for: An Embodied Agent Learning Affordances With Intrinsic Motivations and Solving Extrinsic Tasks With Attention and One-Step Planning
Source: PubMed Central journal article supplement (PMC6676802; doi:10.3389/fnbot.2019.00045), 2019-07-26
Supplement: Image_1.pdf [file Image_1.pdf]

# **An embodied agent learning affordances with intrinsic motivations and solving extrinsic tasks with attention and one-step planning**

## **SUPPLEMENTARY MATERIAL**

**Gianluca Baldassarre<sup>1,\*</sup>, William Lord<sup>2</sup>, Giovanni Granato<sup>1</sup>, and Vieri Giuliano Santucci<sup>1</sup>**

*<sup>1</sup>Laboratory of Computational Embodied Neuroscience, Institute of Cognitive Sciences and Technologies, National Research Council of Italy, Rome, Italy*

*<sup>2</sup>School of Engineering Sciences, KTH Royal Institute of Technology, Stockholm, Sweden*

Correspondence\*:  
Gianluca Baldassarre  
[gianluca.baldassarre@istc.cnr.it](mailto:gianluca.baldassarre@istc.cnr.it)

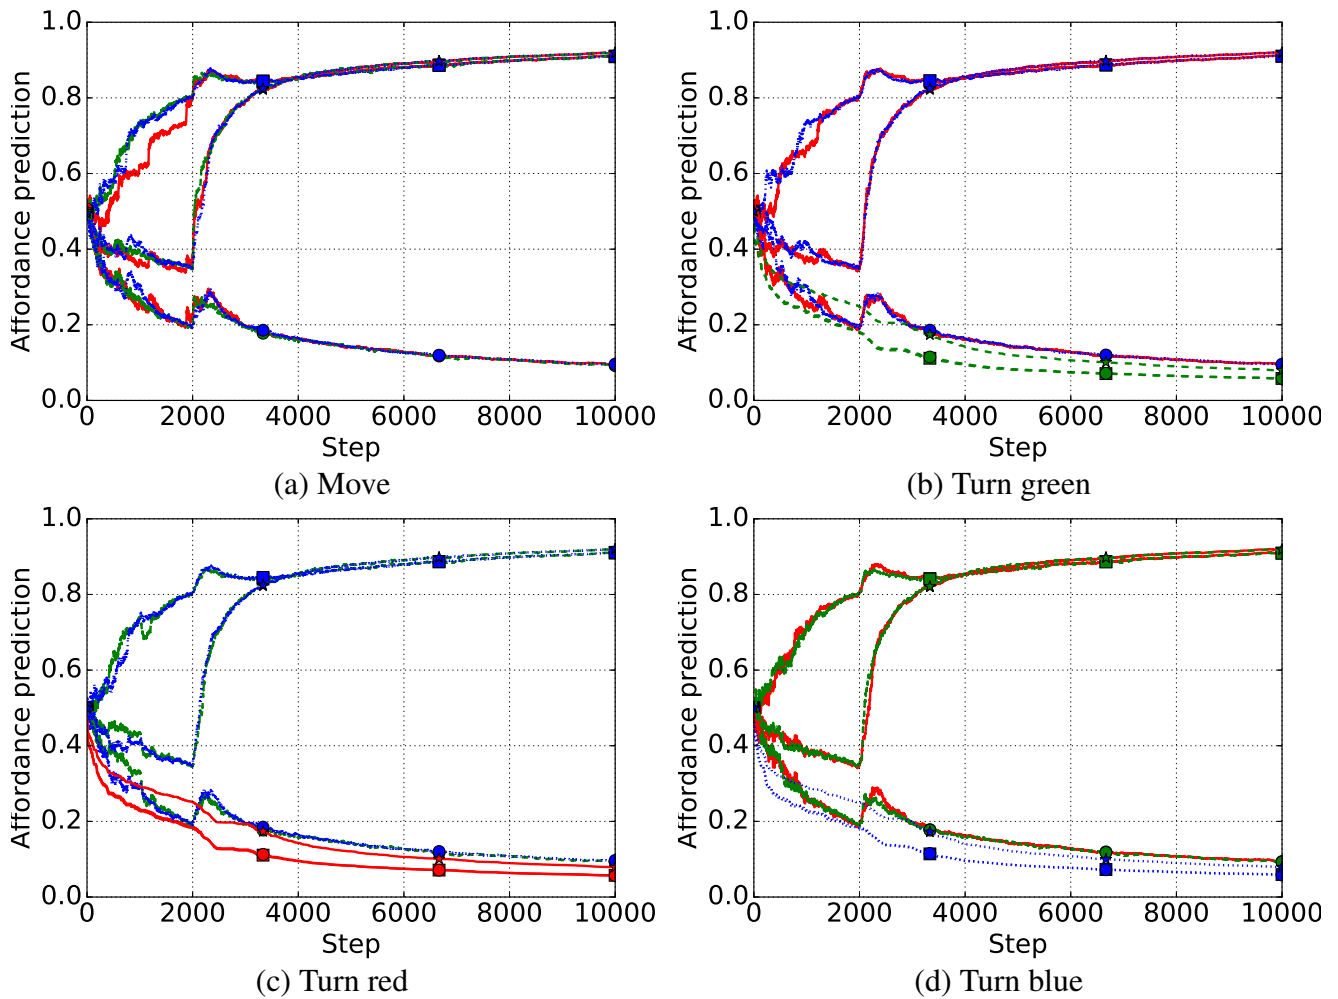

**Figure 1.** IGN model average affordance predictions in the second late objects experiment intrinsic phase, for all four actions (a, b, c, d) on all nine objects (red, green and blue; squares marked as squares, circles marked as circles and rectangles marked as stars).

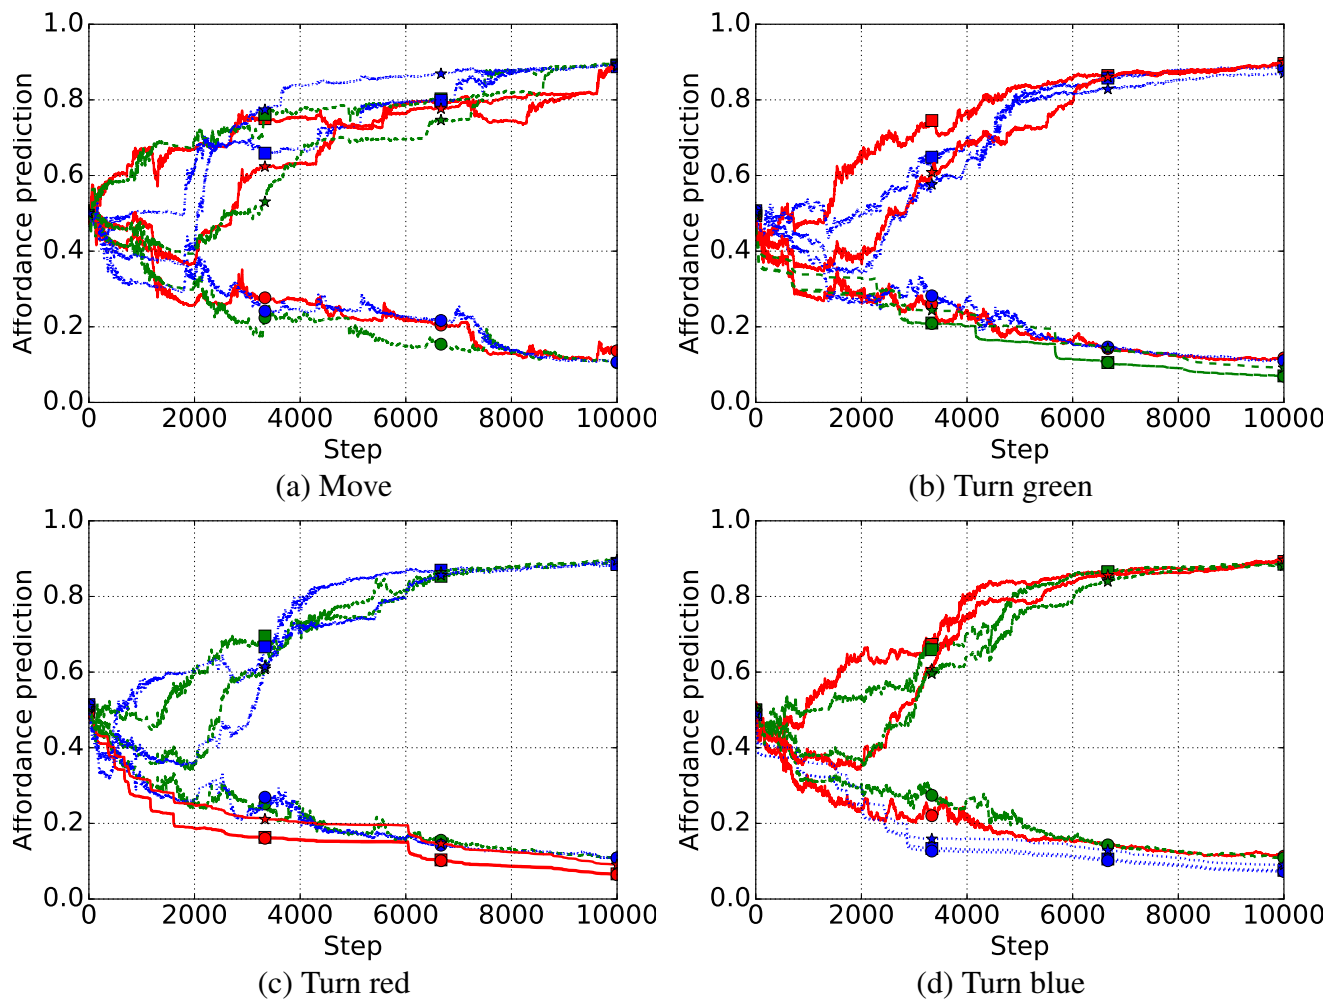

**Figure 2.** IMP model average affordance predictions in the second late objects experiment intrinsic phase, for all four actions (a, b, c, d) on all nine objects (red, green and blue; squares marked as squares, circles marked as circles and rectangles marked as stars).

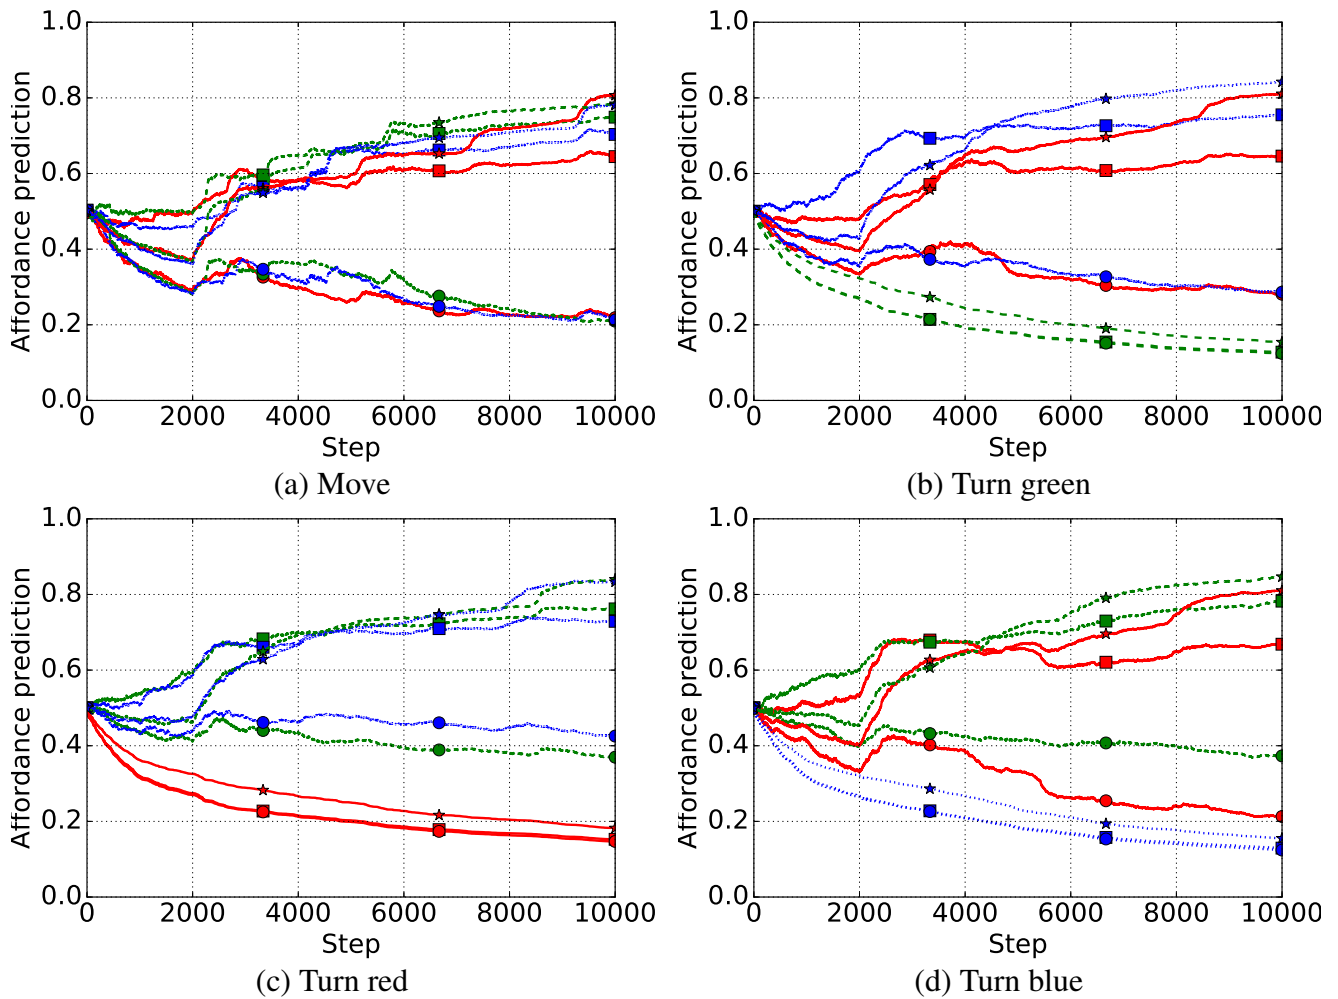

**Figure 3.** FIX model average affordance predictions in the second late objects experiment intrinsic phase, for all four actions (a, b, c, d) on all nine objects (red, green and blue; squares marked as squares, circles marked as circles and rectangles marked as stars).

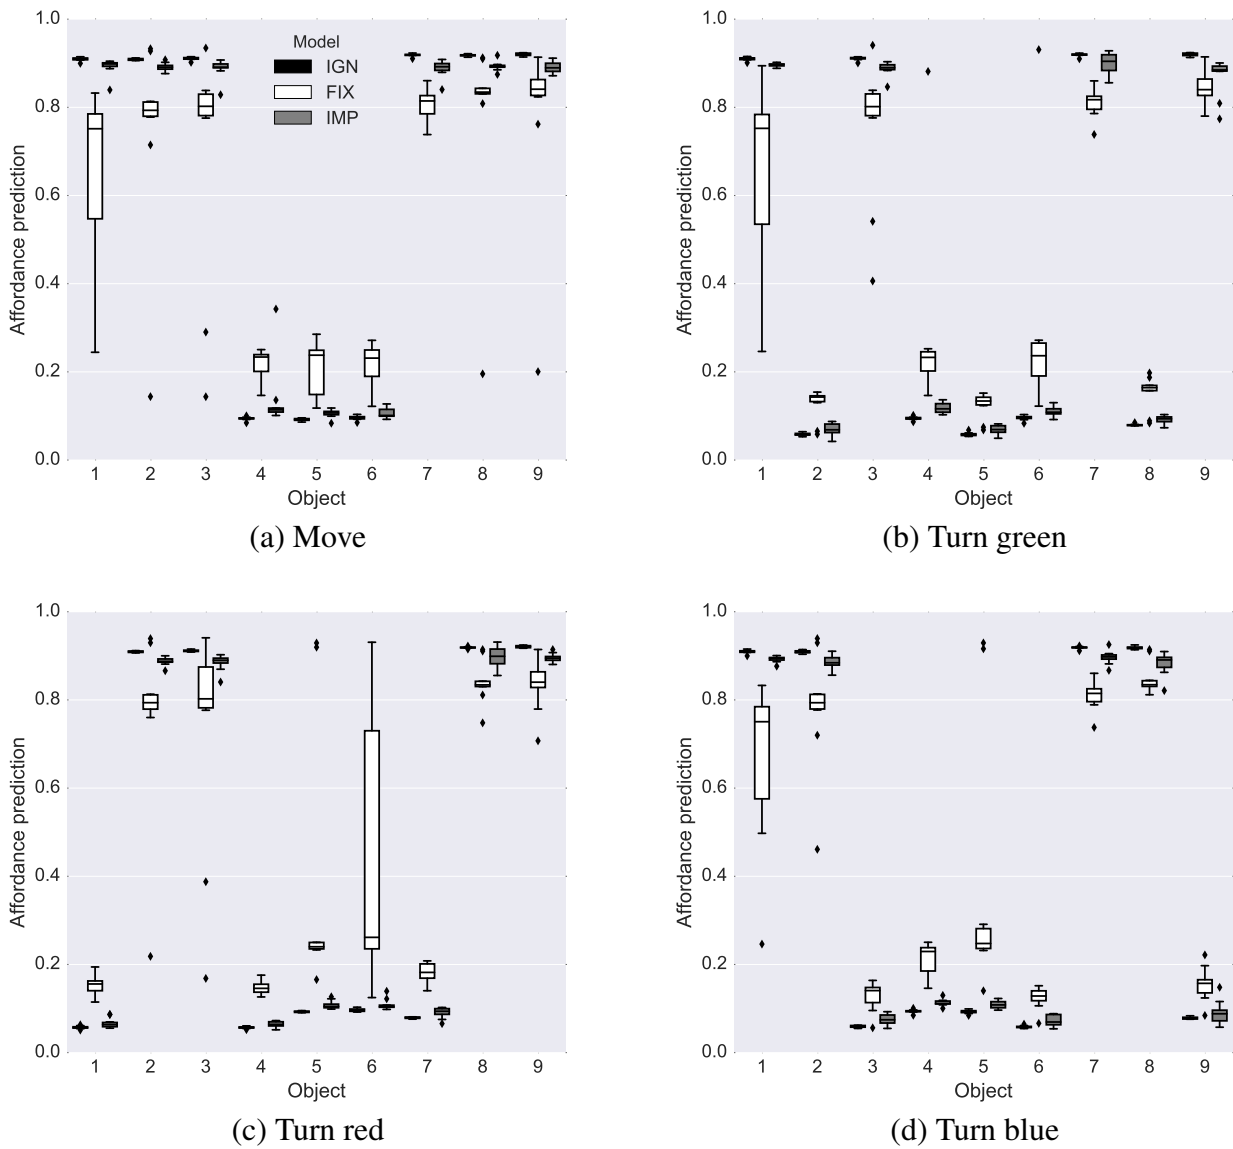

**Figure 4.** Second late objects test, affordance predictions for all four actions (a, b, c, d) on all nine objects for the 10 simulations after 10000 steps of intrinsic phase.

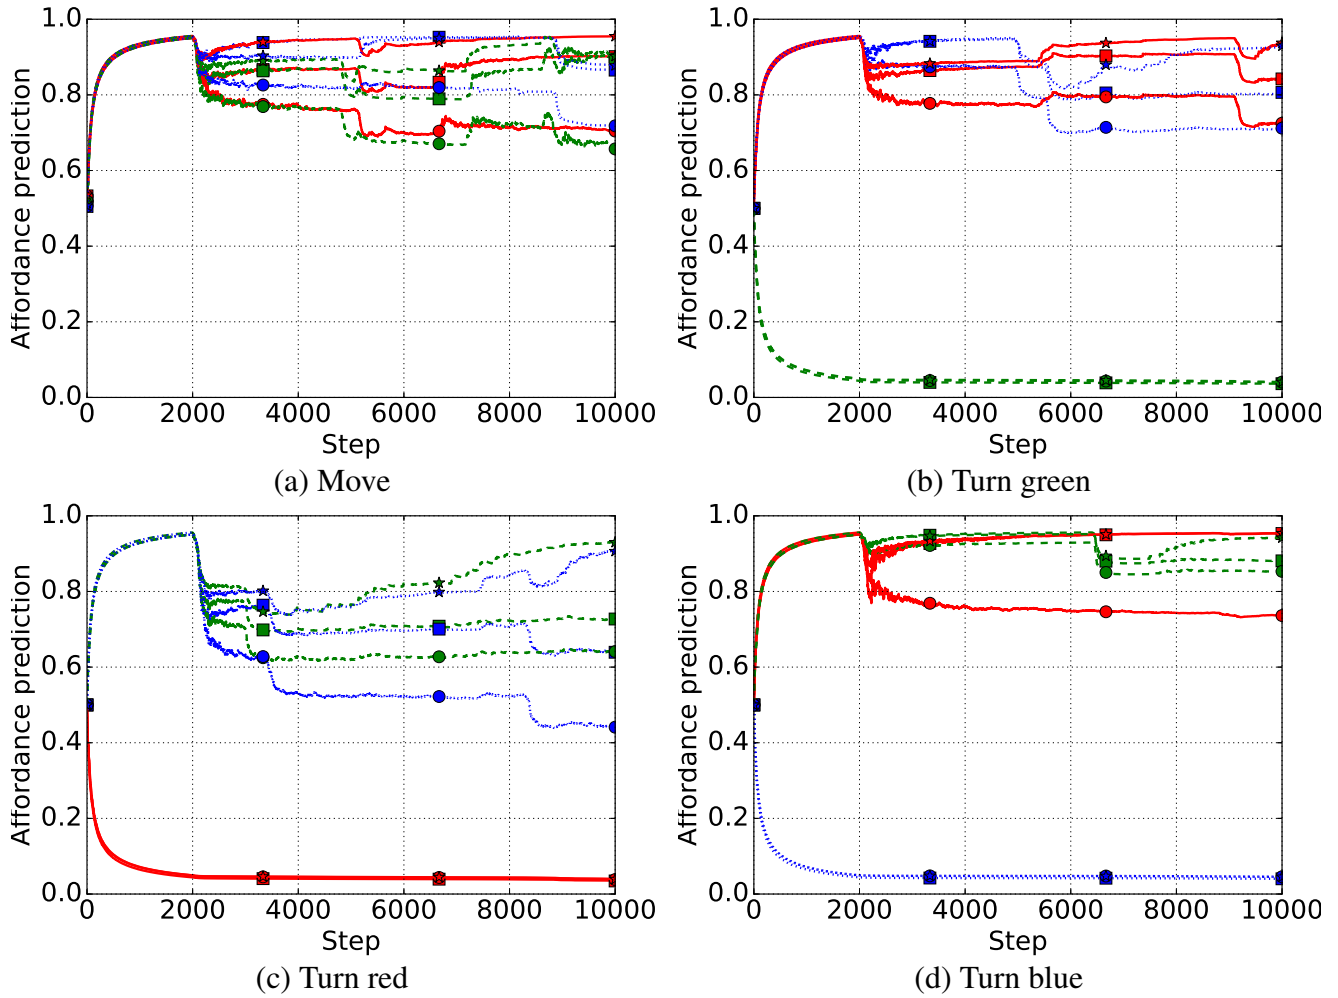

**Figure 5.** IGN model average affordance predictions in the third late objects experiment intrinsic phase, for all four actions (a, b, c, d) on all nine objects (red, green and blue; squares marked as squares, circles marked as circles and rectangles marked as stars).

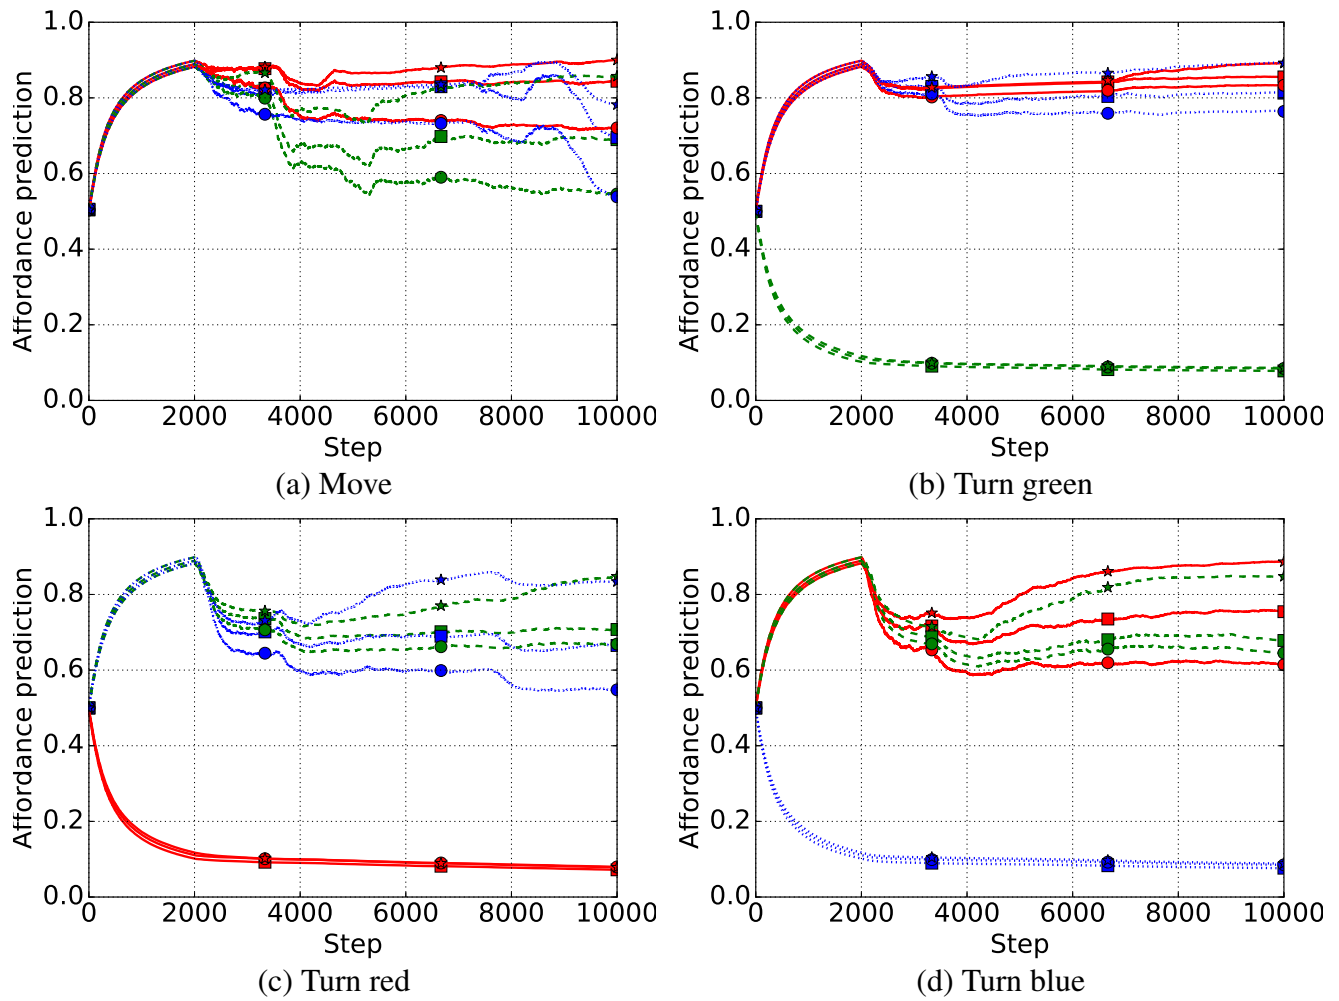

**Figure 6.** FIX model average affordance predictions in the third late objects experiment intrinsic phase, for all four actions (a, b, c, d) on all nine objects (red, green and blue; squares marked as squares, circles marked as circles and rectangles marked as stars).

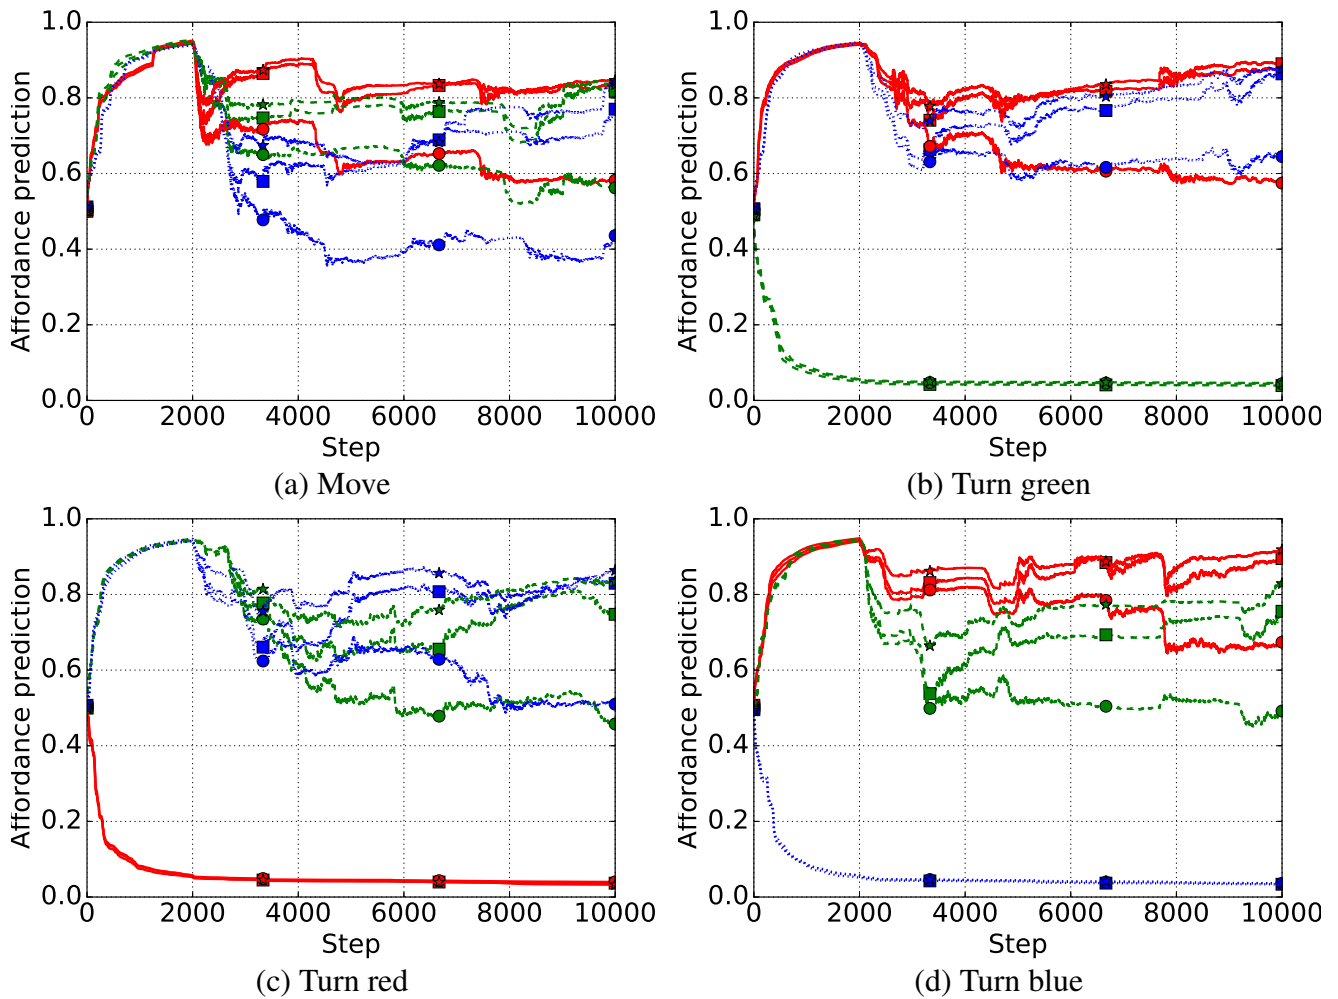

**Figure 7.** IMP model average affordance predictions in the third late objects experiment intrinsic phase, for all four actions (a, b, c, d) on all nine objects (red, green and blue; squares marked as squares, circles marked as circles and rectangles marked as stars).



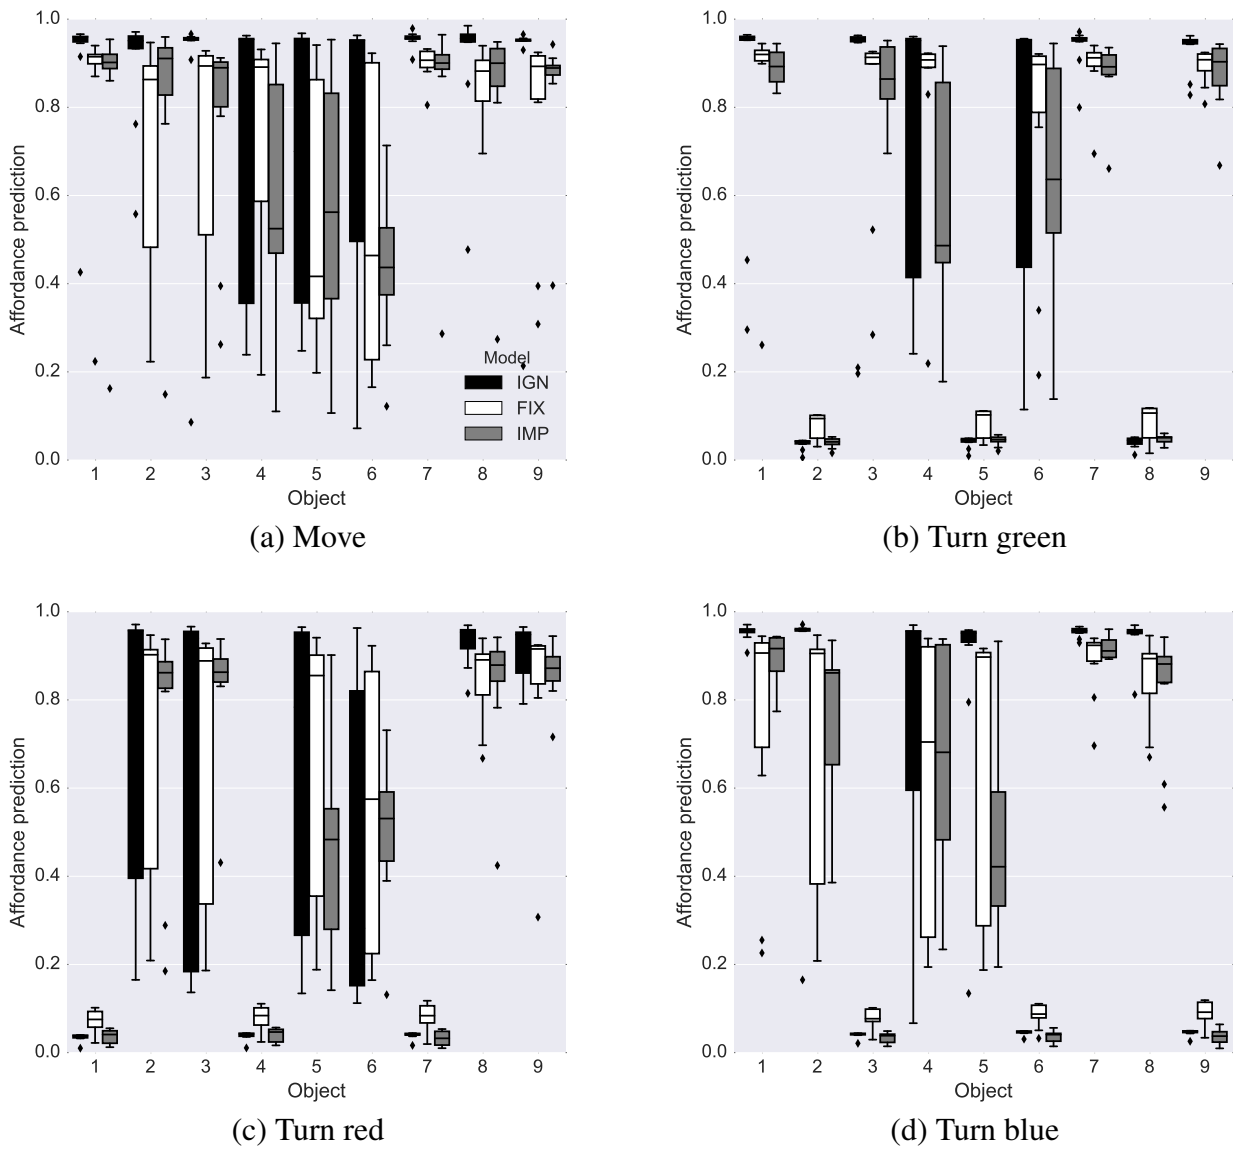

**Figure 8.** Third late objects test, affordance predictions for all four actions (a, b, c, d) on all nine objects for the 10 simulations after 10000 steps of intrinsic phase.
